# Supplementary material
Source: PubMed Central journal article supplement (PMC3795334)
Supplement: supp_126.20.4560_JCS117663.pdf [file supp_126.20.4560_JCS117663.pdf]

SUPPLEMENTAL TABLES

**Table S1. Plasmids used in this study**

| <b>Plasmid</b>                      | <b>Description</b>                                                                                                             | <b>Ref</b>                    |
|-------------------------------------|--------------------------------------------------------------------------------------------------------------------------------|-------------------------------|
| Yep13-GFP-Bem3                      | GFP-Bem3, 2 $\mu$ <i>LEU2</i>                                                                                                  | (Caviston et al., 2003)       |
| pRS316-HA-mRFP-cSNC1                | HA-mRFP-cSnc1, CEN <i>URA3</i>                                                                                                 | (Robinson et al., 2006)       |
| PHO5pr-RFP-Vps21                    | RFP-Vps21 expressed from <i>PHO5</i> promoter, CEN <i>TRP1</i>                                                                 | (Markgraf et al., 2009)       |
| pRS416-Cherry-Vps4 <sup>E233Q</sup> | Cherry-Vps4 <sup>E233Q</sup> expressed from Vps21 promoter, CEN <i>URA3</i>                                                    | (Davies et al., 2010)         |
| pRS315-GFP-Sec4                     | GFP-Sec4, CEN <i>LEU2</i>                                                                                                      | (Calero et al., 2003)         |
| pRS315-GFP-Rga1                     | GFP-Rga1, CEN <i>LEU2</i>                                                                                                      | (Caviston et al., 2003)       |
| pRS315-Cdc24-GFP                    | GFP-Cdc24, CEN <i>LEU2</i>                                                                                                     | Erfei Bi Lab                  |
| Gic1-GFPx3                          | <i>GIC1</i> in pRS316-P*(a derivative of pRS316) with triple GFP tag inserted in frame with construct. CEN <i>URA3</i> variant | (Takahashi and Pryciak, 2007) |
| pGAL1.416-Bem3-GFP                  | GFP-Bem3 expressed from a GAL1 promoter, CEN <i>URA3</i>                                                                       | (Knaus et al., 2007)          |
| pYES2.1/V5-HIS-TOPO-Sec15           | Sec15 expressed from the GAL1 promoter, 2 $\mu$ <i>URA3</i>                                                                    | This study                    |
| pYES2.1/V5-HIS-TOPO-Sro7            | Sro7 expressed from the GAL1 promoter, 2 $\mu$ <i>URA3</i>                                                                     | This study                    |
| pRS315-GFP-Sec4 <sup>Q79L</sup>     | GFP- Sec4 <sup>Q79L</sup> , CEN <i>LEU2</i>                                                                                    | This study                    |
| pRS315-GFP-Sec4 <sup>S29N</sup>     | GFP- Sec4 <sup>S29N</sup> , CEN <i>LEU2</i>                                                                                    | This study                    |
| Yep13-GFP-Bem3 <sup>PHm</sup>       | GFP-Bem3 <sup>R644S, R645S, K647D</sup> 2 $\mu$ <i>LEU2</i>                                                                    | This study                    |
| Yep13-GFP-Bem3 <sup>K1003A</sup>    | GFP-Bem3 <sup>K1003A</sup> 2 $\mu$ <i>LEU2</i>                                                                                 | This study                    |
| Yep13-GFP-Bem3PX mutant             | GFP-Bem3 <sup>Y524W, R578S, L580W, F581M</sup> 2 $\mu$ <i>LEU2</i>                                                             | This study                    |
| PX-PH domain-His6                   | pET28a HIS <sub>6</sub> -BEM3 <sup>491-774</sup>                                                                               | This study                    |
| Yep13-HA-Bem3                       | HA-Bem3, 2 $\mu$ <i>LEU2</i>                                                                                                   | This study                    |
| pGAL1.426-Bem3-HA-His6              | Bem3 expressed from GAL1 promoter, 2 $\mu$ <i>URA3</i>                                                                         | This study                    |

|                                           |                                                                     |                          |
|-------------------------------------------|---------------------------------------------------------------------|--------------------------|
| pAD54-RFP-SEC4                            | RFP-Sec4 expressed from the ADH promoter, 2μ <i>LEU2</i>            | (Aronov and Gerst, 2004) |
| pYES2.1/V5-HIS-TOPO-CaBem3                | CaBem3 expressed from the GAL1 promoter, 2μ <i>URA3</i>             | This study               |
| pGAL1.426-Bem3 <sup>K1003A</sup> -HA-His6 | Bem3 <sup>K1003A</sup> expressed from GAL1 promoter, 2μ <i>URA3</i> | This study               |

**Table S2. Strains used in this study**

| <b>Name</b>                                                                                                                                                                                                                                                                                                                                                                                                                                                                                                                             | <b>Genotype</b>                                                                                                                                            | <b>Source</b>                |
|-----------------------------------------------------------------------------------------------------------------------------------------------------------------------------------------------------------------------------------------------------------------------------------------------------------------------------------------------------------------------------------------------------------------------------------------------------------------------------------------------------------------------------------------|------------------------------------------------------------------------------------------------------------------------------------------------------------|------------------------------|
| W303                                                                                                                                                                                                                                                                                                                                                                                                                                                                                                                                    | <i>Mata ade2-1 his3-1 leu2-3112 trp1-1 ura3-1 can1-100</i>                                                                                                 | Laboratory Strain            |
| SEY6210                                                                                                                                                                                                                                                                                                                                                                                                                                                                                                                                 | <i>MATa leu2-3,112 ura3-52 his3-200 trp1-901 lys2-801<br/>suc2-9</i>                                                                                       | Laboratory Strain            |
| BY4741                                                                                                                                                                                                                                                                                                                                                                                                                                                                                                                                  | <i>MATa his3Δ1 leu2Δ0 met15Δ0 ura3Δ0</i>                                                                                                                   | Invitrogen                   |
| RH4344<br>( <i>rcy1Δ</i> )                                                                                                                                                                                                                                                                                                                                                                                                                                                                                                              | <i>Mata yjl204c::kanMX his4 leu2 ura3 lys2 bar1</i>                                                                                                        | (Wiederkehr et al.,<br>2000) |
| RLY 3090                                                                                                                                                                                                                                                                                                                                                                                                                                                                                                                                | <i>Mata BEM3-GFP::HIS5 his3Δ1;leu2Δ0;met15Δ0;ura3Δ0</i>                                                                                                    | (Huh et al., 2003)           |
| <i>vps29Δ</i>                                                                                                                                                                                                                                                                                                                                                                                                                                                                                                                           | <i>vps29::kanMX</i> in W303                                                                                                                                | This study                   |
| Bem3-GFP<br>(Diploid)                                                                                                                                                                                                                                                                                                                                                                                                                                                                                                                   | <i>MATa/α his3Δ1/his3Δ1 leu2Δ0/leu2Δ0 lys2Δ0/lys2Δ0<br/>met15Δ0/ met15Δ0 ura3Δ0/ura3Δ0</i> transformed with<br>Yep13-GFP-Bem3                              | This study                   |
| <i>sla2Δ</i><br>[see Note1]                                                                                                                                                                                                                                                                                                                                                                                                                                                                                                             | <i>MATa sla2:: HisMX leu2-3,112 ura3-52 his3-200 trp1-901<br/>lys2-801 suc2-9</i>                                                                          | (Stefan et al., 2005)        |
| <i>BWY2595</i><br>( <i>ent1Δ, ent2Δ,<br/>yap1801Δ,<br/>yap1802Δ</i> )<br>[see Note2]                                                                                                                                                                                                                                                                                                                                                                                                                                                    | <i>Mata leu2-3 ura3-52 his3-Δ200 trp1-Δ901 lys2-801 suc2-<br/>Δ9 ent1::LEU2 ent2::HIS3 yap1801::HIS3<br/>yap1802::LEU2+ pBW0778 (ent1ENTH domain, CEN)</i> | Wendland lab                 |
| <i>bem3Δ</i>                                                                                                                                                                                                                                                                                                                                                                                                                                                                                                                            | <i>MATa bem3::kanMX his3Δ1 leu2Δ0 met15Δ0 ura3Δ0</i>                                                                                                       | Hazbun Lab                   |
| DAO2C                                                                                                                                                                                                                                                                                                                                                                                                                                                                                                                                   | <i>Mata ura3, leu2, met1,cdc3-6</i>                                                                                                                        | Haarer Lab                   |
| <i>sec4-8</i>                                                                                                                                                                                                                                                                                                                                                                                                                                                                                                                           | <i>Mata sec4-8 ura 3-52</i>                                                                                                                                | Novick Lab                   |
| <p><b>Note1:</b> <i>sla2Δ</i>: Sla2 knockout strain defective for endocytosis and proper actin cytoskeleton organization. Formation of actin comet tails associated with endocytic sites in these cells has been reported. (Kaksonen et. al., <i>Cell</i> <b>115</b>, 475–48 (2003).</p> <p><b>Note2:</b> Quadruple mutant strain with deletions of ENT1, ENT2, YAP1801, and YAP1802. The ENTH domain of Ent1 is expressed from a plasmid to maintain viability. These cells are defective in endocytosis and are inviable at 37°C.</p> |                                                                                                                                                            |                              |

| <b>Table S3. Antibodies used in this study</b> |                  |              |                              |                 |
|------------------------------------------------|------------------|--------------|------------------------------|-----------------|
| <b>Host</b>                                    | <b>Antigen</b>   | <b>Clone</b> | <b>Source</b>                | <b>Dilution</b> |
| Mouse                                          | HIS <sub>6</sub> | 6XHIS        | Clontech, CA                 | 1:5000          |
| Mouse                                          | HA               | HA.11        | Covance, NJ                  | 1:2000          |
| Rabbit                                         | Bgl2             | 9937F        | Schekman Lab                 | 1:10,000        |
| Mouse                                          | Pma1             | 40B7         | Encor Biotechnology Inc., FL | 1:5000          |

## SUPPLEMENTAL REFERENCES

- Aronov, S. and Gerst, J. E.** (2004). Involvement of the late secretory pathway in actin regulation and mRNA transport in yeast. *Journal of Biological Chemistry* **279**, 36962–36971.
- Calero, M., Chen, C. Z., Zhu, W. Y., Winand, N., Havas, K. A., Gilbert, P. M., Burd, C. G. and Collins, R. N.** (2003). Dual prenylation is required for Rab protein localization and function. *Molecular Biology of the Cell* **14**, 1852–1867.
- Caviston, J. P., Longtine, M., Pringle, J. R. and Bi, E.** (2003). The role of Cdc42p GTPase-activating proteins in assembly of the septin ring in yeast. *Molecular Biology of the Cell* **14**, 4051–4066.
- Davies, B. A., Azmi, I. F., Payne, J., Shestakova, A., Horazdovsky, B. F., Babst, M. and Katzmann, D. J.** (2010). Coordination of Substrate Binding and ATP Hydrolysis in Vps4-Mediated ESCRT-III Disassembly. *Molecular Biology of the Cell* **21**, 3396–3408.
- Huh, W.-K., Falvo, J. V., Gerke, L. C., Carroll, A. S., Howson, R. W., Weissman, J. S. and O’Shea, E. K.** (2003). Global analysis of protein localization in budding yeast. *Nature* **425**, 686–691.
- Knaus, M., Pelli-Gulli, M. P., Van Drogen, F., Springer, S., Jaquenoud, M. and Peter, M.** (2007). Phosphorylation of Bem2p and Bem3p may contribute to local activation of Cdc42p at bud emergence. *Embo Journal* **26**, 4501–4513.
- Markgraf, D. F., Ahnert, F., Arlt, H., Mari, M., Peplowska, K., Epp, N., Griffith, J., Reggiori, F. and Ungermann, C.** (2009). The CORVET Subunit Vps8 Cooperates with the Rab5 Homolog Vps21 to Induce Clustering of Late Endosomal Compartments. *Molecular Biology of the Cell* **20**, 5276–5289.
- Robinson, M., Poon, P. P., Schindler, C., Murray, L. E., Kama, R., Gabriely, G., Singer, R. A., Spang, A., Johnston, G. C. and Gerst, J. E.** (2006). The Gcs1 Arf-GAP mediates Snc1,2 v-SNARE retrieval to the Golgi in yeast. *Molecular Biology of the Cell* **17**, 1845–1858.
- Stefan, C. J., Padilla, S. M., Audhya, A. and Emr, S. D.** (2005). The phosphoinositide phosphatase Sjl2 is recruited to cortical actin patches in the control of vesicle formation and fission during endocytosis. *Molecular and Cellular Biology* **25**, 2910–2923.
- Takahashi, S. and Pryciak, P. M.** (2007). Identification of novel membrane-binding domains in multiple yeast Cdc42 effectors. *Molecular Biology of the Cell* **18**, 4945–4956.
- Wiederkehr, A., Avaro, S., Prescianotto-Baschong, C., Haguener-Tsapis, R. and Riezman, H.** (2000). The F-box protein Rcy1p is involved in endocytic membrane traffic and recycling out of an early endosome in *Saccharomyces cerevisiae*. *Journal of Cell Biology* **149**, 397–410.

## SUPPLEMENTARY FIGURE LEGENDS

**Figure S1.** (A) *sla2Δ* cells expressing GFP-Bem3 and RFP-tagged Ede1/Abp1, (B) GFP-Bem3-expressing *ent1Δ/ent2Δ /yap1801Δ/yap1802Δ* cells or (C) WT cells expressing GFP-Rga1, GFP-Cdc24 and GFP $\alpha$ 3-Gic1 from their respective endogenous promoters, were imaged at 100X using a FITC filter. Scale bars: 5 $\mu$ m

**Figure S2.** GFP-Bem3 was expressed from the indicated promoters and copy numbers in W303 WT cells (except RL 3090=endogenous promoter, single copy) and grown overnight at 30°C in the appropriate selective media containing 2% glucose and imaged at 100X using a FITC filter. High levels of Bem3 expression from the *GALI* promoter were achieved by growing cells in 2% galactose containing media for 4 hours prior to imaging. Arrows and arrowheads point to Bem3 at polarized cap and intracellular Bem3-containing compartments, respectively. Scale bar: 5 $\mu$ m

**Figure S3.** Intracellular compartments marked by Yep13-GFP-Bem3 were visualized in W303 WT cells expressing empty vector (EV) control or overexpressing Ypt31<sup>N126I</sup> from a *GALI* promoter. Cells were grown overnight in galactose containing selective media at 30°C and imaged at 100X using a FITC filter. The total area of Bem3-containing compartments is significantly larger in cells overexpressing Ypt31<sup>N126I</sup> compared to EV control. The total area of the Bem3-containing compartment present within a cell was measured using ImageJ (see material and methods) and plotted as a function of bud/mother area ratio. Scale bar: 5 $\mu$ m

**Figure S4.** (A) Wild-type W303 cells expressing GFP-Bem3 were grown at 24°C (permissive temperature) overnight or shifted to 37°C for 6h (restrictive temperature) before imaging at 100X using a FITC filter. Quantification of the Bem3-compartment area was performed using ImageJ. No significant

difference in Bem3-compartment area was observed when wild-type cells were grown at the restrictive temperature.

**(B)** Cells overexpressing GFP-Bem3<sup>K1003A</sup> (mutant unable to bind Cdc42) were imaged at 100X using a FITC filter and DIC.

**(C)** Cells expressing Sec4-GFP and transformed with either Bem3 full-length, Bem3 PX-PH fragment or empty vector were imaged at 100X using a FITC filter.

**Figure S5.** (A) Wild-type W303 cells expressing GFP-Sec4 and *Candida albicans* CaBem3 from a *GALI* promoter were grown overnight in media containing 2% glucose at 30°C with shaking at 250 RPM, transferred to 2% galactose containing selective media for 4h and imaged at 100X using a FITC filter. Arrows point to clustered GFP-Sec4. Scale bar: 5µm. (B) *sec4-10* cells expressing GFP-Bem3 were imaged at 100X using a FITC filter.

**Supplementary Movie 1. Dynamics of the Bem3-containing compartment.**

W303 yeast cells transformed with Yep13-GFP-Bem3 (2µ, *LEU2*) were grown overnight in selective media, spotted on media-embedded agarose beds the next morning and imaged with a FITC filter using a 100X objective at 10 second intervals. The cell outline is marked. Movie playback rate: 7 frames/second. Scale bar: 5µm.

Supplementary Figure 1

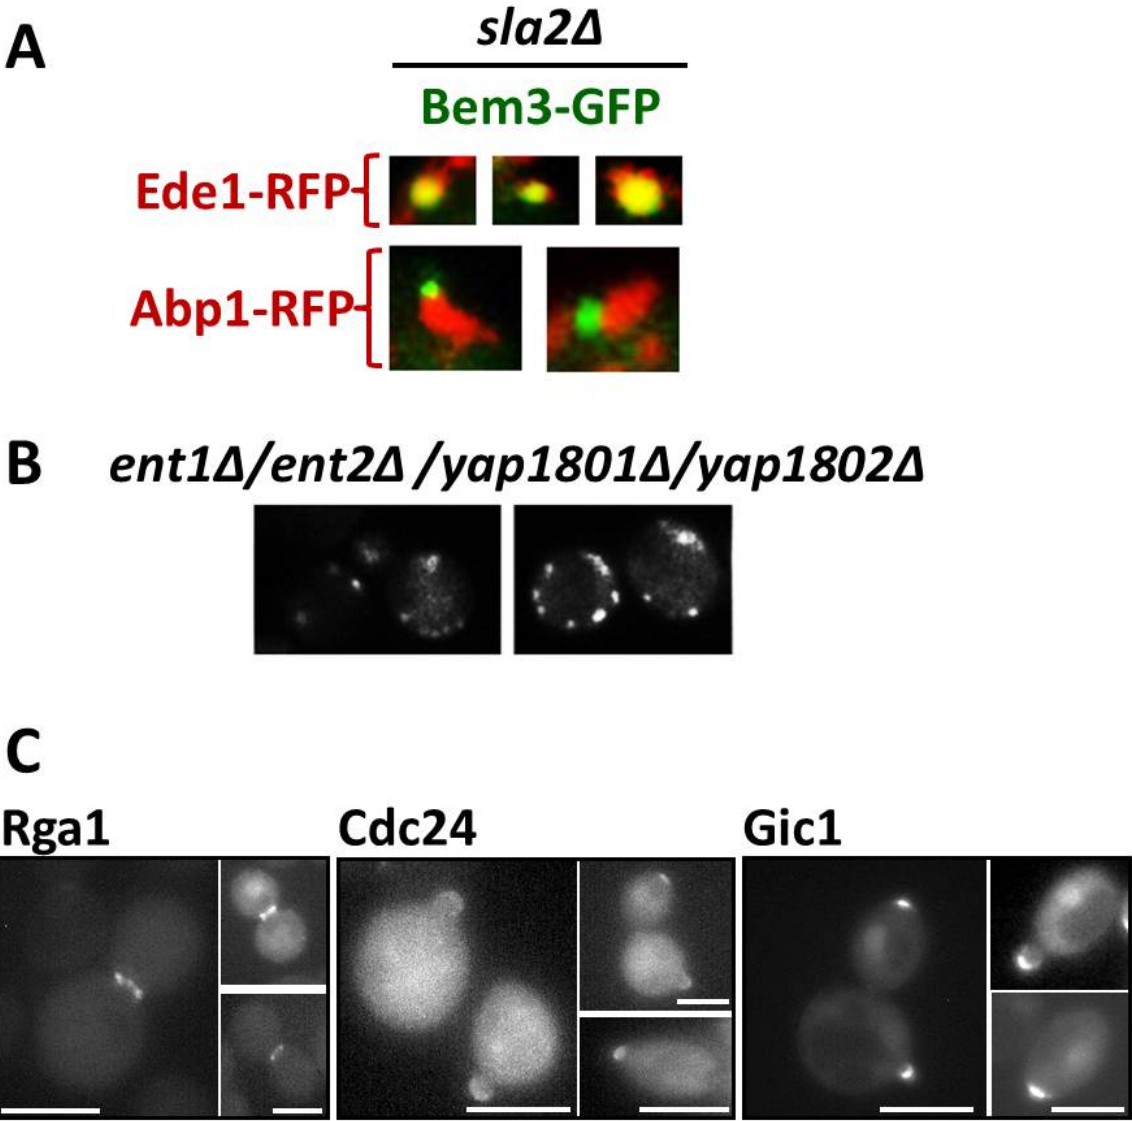



Mukherjee et al., **Supplementary Figure 2**

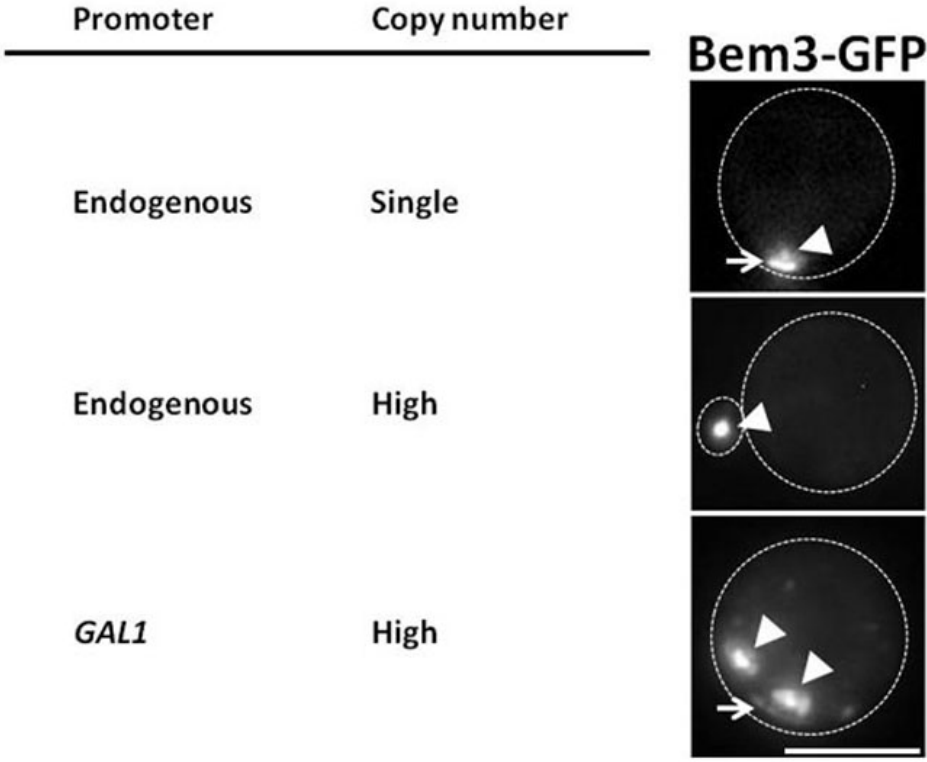

Mukherjee et al.,

### Supplementary Fig. 3

### Bem3-GFP

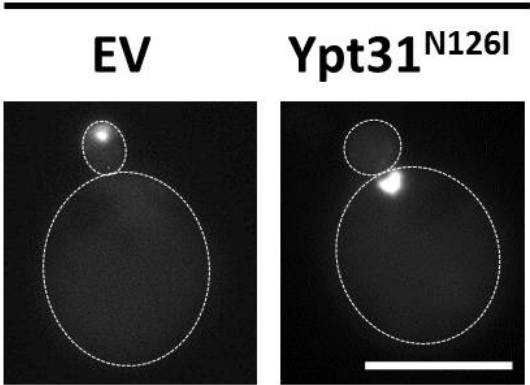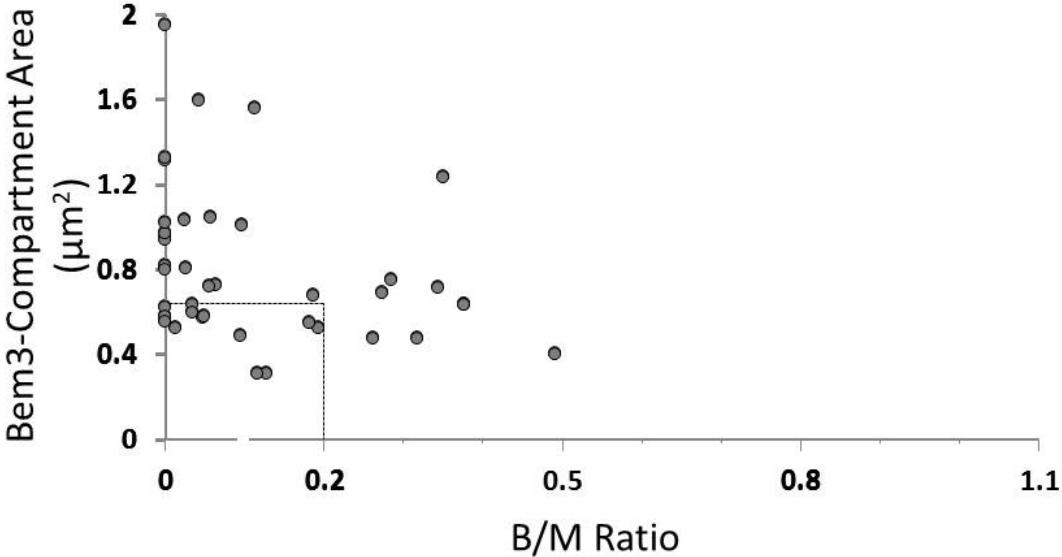

Supplementary Figure 4

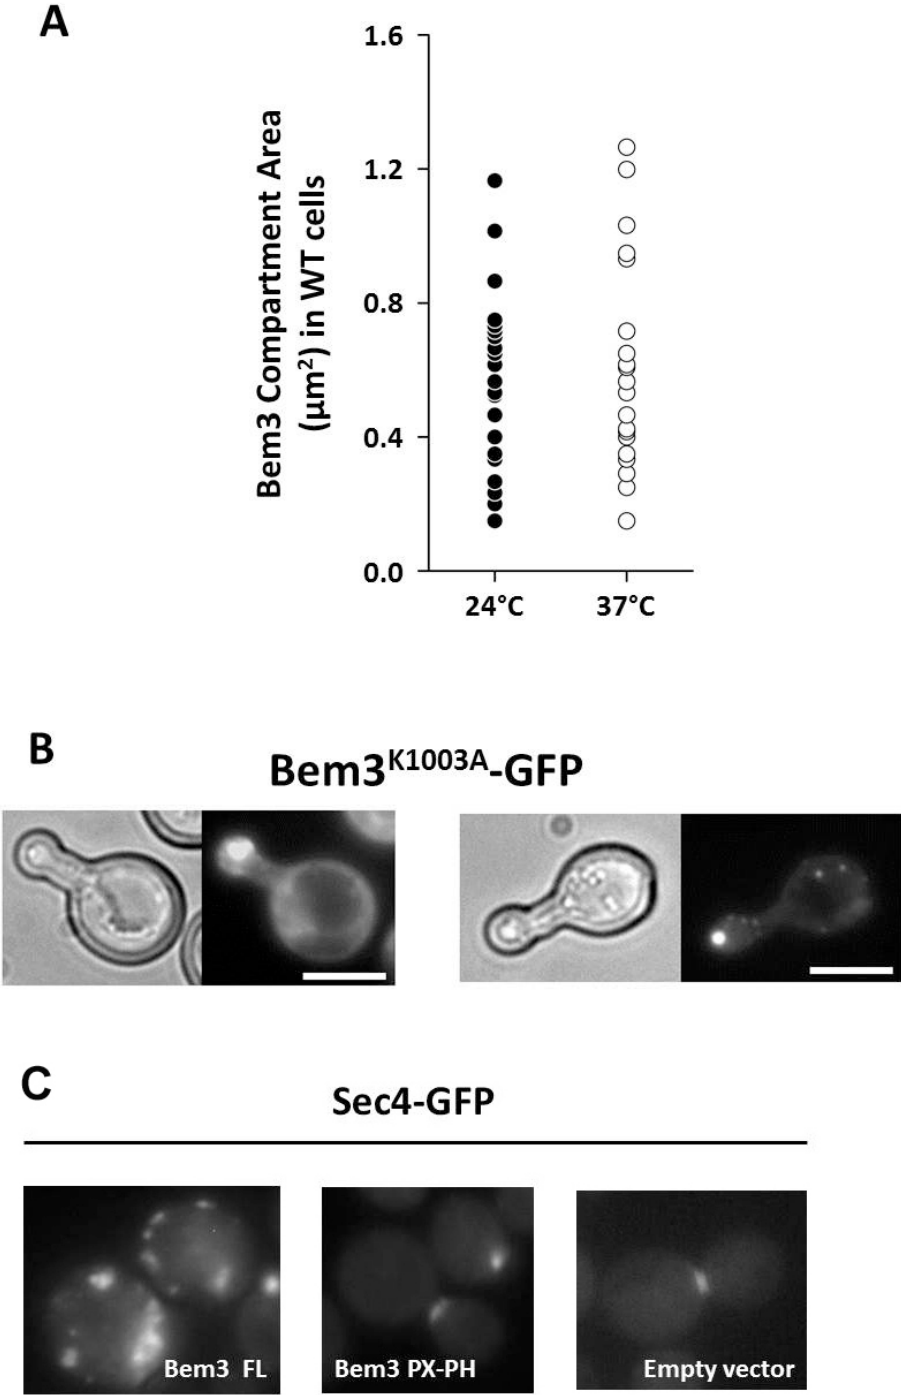

Supplementary Figure 5

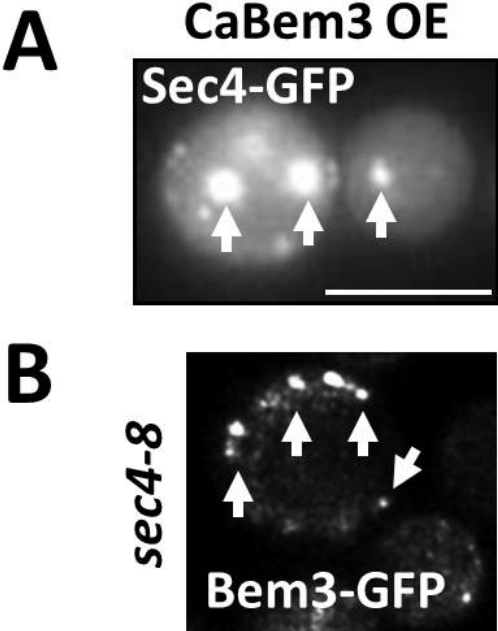

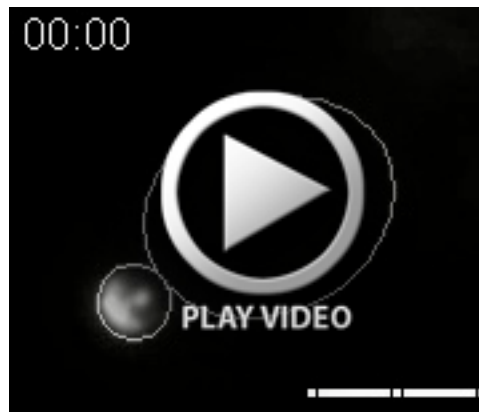

**Movie 1. Dynamics of the Bem3-containing compartment.** W303 yeast cells transformed with Yep13-GFP-Bem3 ( $2\mu$ , *LEU2*) were grown overnight in selective media, spotted on media-embedded agarose beds the next morning and imaged with a FITC filter using a  $100\times$  objective at 10 second intervals. The cell outline is marked. Movie playback rate: 7 frames/second. Scale bar: 5  $\mu\text{m}$ .
